# Supplementary material
Source: Springer Nature journal article supplement (https://www.springermedizin.de/resource/supplementary/12877_2009_188_MOESM1_ESM.pdf/9441358)
Supplement: MOESM1 [file 9441358]

**Table 1. Characteristics of service users by sustained or improved vs. deteriorated groups (n=624)**

| Lower care needs level group             | Change in care needs level       |                        | t- value | p-value |
|------------------------------------------|----------------------------------|------------------------|----------|---------|
|                                          | Sustained or Improved (SI group) | Deteriorated (D group) |          |         |
| <i>Variable</i>                          | n=405                            | n=87                   |          |         |
|                                          | Mean±SD                          | Mean±SD                |          |         |
| Age <sup>††</sup>                        | 80.3±8.5                         | 83.7±7.7               | 3.50     | <0.001* |
|                                          | n (%)                            | n (%)                  | $\chi^2$ | p-value |
| Gender <sup>†</sup>                      |                                  |                        |          |         |
| Male                                     | 127 (31)                         | 25 (29)                |          |         |
| Female                                   | 278 (69)                         | 62 (71)                | 0.23     | 0.631   |
| Baseline care needs level <sup>†††</sup> |                                  |                        |          |         |
| 0                                        | 100 (25)                         | 21 (24)                |          |         |
| 1                                        | 226 (56)                         | 44 (51)                |          |         |
| 2                                        | 79 (20)                          | 22 (25)                |          | 0.436   |
| Higher care needs level group            | Change in care needs level       |                        | t- value | p-value |
|                                          | Sustained or Improved (SI group) | Deteriorated (D group) |          |         |
| <i>Variables</i>                         | n=116                            | n=16                   |          |         |
|                                          | Mean±SD                          | Mean±SD                |          |         |
| Age <sup>††</sup>                        | 83.2±10.6                        | 83.5±11.0              | 0.10     | 0.922   |
|                                          | n (%)                            | n (%)                  | $\chi^2$ | p-value |
| Gender <sup>†</sup>                      |                                  |                        |          |         |
| Male                                     | 34 (29)                          | 5 (31)                 |          |         |
| Female                                   | 82 (71)                          | 11 (69)                | 0.03     | 0.870   |
| Baseline care needs level <sup>†††</sup> |                                  |                        |          |         |
| 3                                        | 56 (48)                          | 10 (63)                |          |         |
| 4                                        | 35 (30)                          | 6 (38)                 |          |         |
| 5                                        | 25 (22)                          | 0 (0)                  |          | 0.118   |

\* p<0.05

†  $\chi^2$  test

†† unpaired t-test

††† Wilcoxon rank-sum test
